# Supplementary material for: Group III phospholipase A2 downregulation attenuated survival and metastasis in ovarian cancer and promotes chemo-sensitization
Source: PubMed Central journal article supplement (PMC8173968; doi:10.1186/s13046-021-01985-9), 2021-06-03

1 **Group III phospholipase A2 downregulation attenuated survival and metastasis in ovarian**  
2 **cancer and promotes chemo-sensitization**

3

4 Upasana Ray<sup>1</sup>, Debarshi Roy<sup>1,2</sup>, Ling Jin<sup>1</sup>, Prabhu Thirusangu<sup>1</sup>, Julie Staub<sup>1</sup>, Yinan Xiao<sup>1</sup>,  
5 Eleftheria Kalogera<sup>3</sup>, Andrea E. Wahner Hendrickson<sup>4</sup>, Grace Cullen<sup>4</sup>, Krista Goergen<sup>5</sup>, Ann L.  
6 Oberg<sup>5</sup> and Viji Shridhar<sup>1\*</sup>

7

8 <sup>1</sup>Department of Experimental Pathology and Medicine, Mayo Clinic, Rochester, MN, USA

9

10 <sup>2</sup>Alcorn State University, Lorman, MS, USA

11

12 <sup>3</sup>Division of Gynecologic Surgery, Mayo Clinic, Rochester, MN, USA

13

14 <sup>4</sup>Department of Internal Medicine, Division of Medical Oncology, Mayo Clinic, Rochester, MN,  
15 USA

16

17 <sup>5</sup>Department of Health Sciences Research, Division of Biomedical Statistics and Informatics,  
18 Mayo Clinic, Rochester, MN, USA

19

20

21

22 \*Correspondence and requests for materials should be addressed to

23

24 **Dr. Viji Shridhar**

25 Department of Experimental Pathology and Laboratory Medicine,

26 Mayo Clinic College of Medicine,

27 Rochester, MN 55905, USA

28 Email: [shridhar.vijayalakshmi@mayo.edu](mailto:shridhar.vijayalakshmi@mayo.edu)

29

30

31

32

33 **Table S1:**

| <b>Antibodies</b>                                                                   | <b>Company</b>                              | <b>Catalog No.</b>                                  | <b>Ab Dilutions</b>     |
|-------------------------------------------------------------------------------------|---------------------------------------------|-----------------------------------------------------|-------------------------|
| 1. Cleaved PARP1                                                                    | Cell Signaling Technology, Danvers, MA      | cst5625                                             | WB- 1:2000              |
| 2. LC3B                                                                             | Cell Signaling Technology, Danvers, MA      | cst3868                                             | WB- 1:2000              |
| 3. P62                                                                              | Santa Cruz Biotechnology, Texas, U.S.A      | sc28359                                             | WB- 1:1000              |
| 4. PCNA                                                                             | Santa Cruz Biotechnology, Texas, U.S.A      | sc9857                                              | WB- 1:1000              |
| 5. Acetylated $\alpha$ tubulin                                                      | Santa Cruz Biotechnology, Texas, U.S.A      | sc-23950                                            | WB- 1:1000              |
| 6. PLA2G3                                                                           | GeneTex, CA, U.S.A                          | GTX110780                                           | WB- 1:1000<br>IF- 1:100 |
| 7. Cleaved caspase 3                                                                | Cell Signaling Technology, Danvers, MA      | cst9664                                             | WB- 1:2000              |
| 8. IFT88                                                                            | Santa Cruz Biotechnology, Texas, U.S.A      | sc-376680                                           | WB- 1:1000              |
| 9. Ki67                                                                             | Cell signaling Technology, Danvers, MA      | cst9027                                             | WB- 1:2000              |
| 10. GAPDH                                                                           | Santa Cruz Biotechnology, Texas, U.S.A      | sc-47724                                            | WB- 1:1000              |
| 11. ATG5                                                                            | Cell Signaling Technology, Danvers, MA      | cst12994                                            | WB- 1:2000              |
| 12. Acetylated $\alpha$ Tubulin Antibody (6-11B-1) Alexa Fluor® 594                 | Santa Cruz Biotechnology, Texas, U.S.A      | sc-23950<br>AF594                                   | IF- 1:100               |
| 13. Human epithelial specific antigen                                               | Chemicon International, Temecula, CA, U.S.A | CBL251                                              | WB- 1:1000              |
| 14. Fibroblast activated protein                                                    | R&D Systems, Inc., MN, U.S.A                | AF3715                                              | WB- 1:1000              |
| 15. SREBP1                                                                          | Santa Cruz Biotechnology, Texas, U.S.A      | sc-13551                                            | WB- 1:1000              |
|                                                                                     |                                             |                                                     |                         |
| <b>Reagents</b>                                                                     | <b>Company</b>                              | <b>Catalog No.</b>                                  |                         |
| 1. IFT88 siRNA (h)                                                                  | Santa Cruz Biotechnology, Texas, U.S.A      | sc-75329                                            |                         |
| 2. PLA2G3 siRNA (h)                                                                 | Santa Cruz Biotechnology, Texas, U.S.A      | sc-75201                                            |                         |
| 3. Bodipy (493/503)                                                                 | Sigma                                       | 790389                                              |                         |
| 4. Baflomycin A1                                                                    | Sigma                                       | B1793                                               |                         |
| 5. Cyto-ID® Autophagy Detection Kit                                                 | Enzo Life Sciences                          | ENZ-51031                                           |                         |
| 6. 3-(4,5-dimethylthiazol-2-yl)-2,5-diphenyltetrazolium bromide (MTT)               | ThermoFisher Scientific                     | M6494                                               |                         |
| 7. Antifade mounting medium with DAPI                                               | Vectashield, Burlingame, CA USA             | H-1200-10                                           |                         |
| 8. Carboplatin                                                                      | TEVA UK limited                             | #55770169                                           |                         |
| 9. Cisplatin                                                                        | Calbiochem                                  | #232120                                             |                         |
| 10. Fetal Bovine Serum (FBS)                                                        | Biowest                                     | #S181A                                              |                         |
| 11. 100 $\mu$ g/ml streptomycin and 100U/ml penicillin                              | Thermo Fisher Scientific                    | 15070063                                            |                         |
| 12. MCDB-105                                                                        | Sigma-Aldrich                               | M6395                                               |                         |
| 13. Medium-199                                                                      | Sigma-Aldrich                               | M4530                                               |                         |
| 14. DMEM/F12,<br>15. DMEM (4.5 g/l glucose),<br>16. RPMI-1640,<br>17. MEM- $\alpha$ | Thermo Fisher Scientific                    | #11330032,<br>#11965118,<br>#11875093,<br>#12571063 |                         |

|                                  |                  |           |
|----------------------------------|------------------|-----------|
| 18. Ultrosor™ G serum substitute | Pall Corporation | 15950-017 |
| 19. pcDNA3.1-2xFLAG-SREBP-1c     | Addgene          | #26802    |

34

35 **Table S2:**

| Cell lines              | Media                      | Supplements                                  |
|-------------------------|----------------------------|----------------------------------------------|
| OVCAR5                  | RPMI-1640                  | 10% FBS and 1% Pen/Strep                     |
| OVCAR8                  | RPMI-1640                  | 10% FBS and 1% Pen/Strep                     |
| PEO1                    | RPMI-1640                  | 10% FBS and 1% Pen/Strep                     |
| OV202                   | RPMI-1640                  | 10% FBS and 1% Pen/Strep                     |
| OVCAR7                  | DMEM (4.5 g/l glucose)     | 10% FBS, 1% Pen/Strep and insulin (0.25U/ml) |
| HeyA8MDR                | DMEM (4.5 g/l glucose)     | 10% FBS and 1% Pen/Strep                     |
| MEF                     | MEM- $\alpha$              | 10% FBS and 1% Pen/Strep                     |
| NOF151hTERT             | MCDB-105: Medium-199 (1:1) | 10% FBS and 1% Pen/Strep                     |
| FTs 240, 194, 190, 257  | DMEM/F12 (1:1)             | 2% Ultrosor G and 1% Pen/Strep               |
| Patient-derived ascites | DMEM/F12 (1:1)             | 15%FBS and 1% Pen/Strep                      |

36

37

38 **Fig. S1. Downregulation of PLA2G3 attenuates OC migration.** (A) Percent PLA2G3 gene  
39 expression altered in serous ovarian cancer as evaluated by TCGA analysis 2018. (B) Wound  
40 healing assay was performed to analyze the migration capability of OVCAR8 KO and SCG-control  
41 cells for 24hrs and in (C) OVCAR5 sh35 KD cells compared to NTC control transfected cells for  
42 24 and 48hrs. (D) Confocal imaging shows Bodipy staining for LD biogenesis in OVACR5 sh33  
43 and sh35 KD cells compared to NTC controls. DAPI was used to stain nucleus and Oleic acid  
44 treatment was used as a positive control (Panel 1).

45 **Fig. S2. KD of PLA2G3 sensitizes HeyA8 MDR cells to CBP treatment.** (A) Immunoblot shows  
46 efficient KD of PLA2G3 in the HeyA8 MDR cells. PCNA used as loading control. Percent cell  
47 viability as assessed by MTT assay in (B) HeyA8 MDR NTC control and (C) sh35 KD cells with  
48 increasing concentration of carboplatin treatment. IC50 values indicate PLA2G3 KD HeyA8MDR  
49 cells are more sensitive to CBP treatment. (D) Graphical representation of percent surviving cells  
50 from the above analysis (\*p<0.05, \*\*p<0.01).

51 **Fig. S3. Abrogation of primary cilia promotes oncogenesis in OC cells.** (A) Western blot  
52 analysis shows efficient siRNA mediated KD of IFT88 resulting in the downregulation of  
53 acetylated  $\alpha$ -tubulin in OVCAR5 cells. PCNA was used as a loading control. (B) Colony forming  
54 potential was assessed in the NTC and IFT88 KD OVCAR5cells. (C) The number of colonies was  
55 counted and plotted as mean  $\pm$  standard deviation (n = 3, \*\*p<0.01). (D) Wound healing assay was  
56 performed in the NTC and IFT88 KD OVCAR5cells and (E) the migration rate quantification at  
57 0hr and 24hr was plotted (\*\*p<0.01). (F) Expression analysis of SREBP1 by western blot in  
58 fallopian tube epithelial cell lines FTs 257, 190 and 194 and the OVCAR8 OC cells with PCNA  
59 as a loading control. Densitometric analysis showing fold change was calculated using Image J  
60 software, normalized, and provided beneath the panel. (G) Western blot analysis of PLA2G3 was

61 shown in fallopian tube epithelial cell lines FT 257 and 190. (H) Primary cilia were detected by IF  
62 using fluorescently tagged-acetylated  $\alpha$ -tubulin (red) in the EV transfected control and SREBP1c  
63 overexpressed FT257 cells with nontargeting siRNA (siNTC) and the PLA2G3 targeting siRNA  
64 (siPLA2G3). Nuclei were stained with DAPI. Scale bar: 10 $\mu$ m.

65 **Fig. S4. PFK158 treatment restores ciliogenesis.** (A) Representative confocal imaging of  
66 fluorescently tagged-acetylated  $\alpha$ -tubulin (red) in OVCAR5 cells upon PFK158 treatment. DAPI  
67 was used to stain nucleus. (B) Western blot analysis of acetylated  $\alpha$ -tubulin levels upon treatment  
68 with BafA1 (50 and 100nM) and 3MA (5 $\mu$ M) with PCNA as loading control. Fold change was  
69 calculated using the Image J software, normalized to PCNA endogenous control and provided  
70 beneath the panel.

71 **Fig. S5. PFK158 treatment reduces cell viability in patient-derived ascites cells.** (A)  
72 Immunoblot analysis of expression of human epithelial specific marker EpCAM and fibroblast  
73 marker FAP for characterization of ascites samples. GAPDH is used as endogenous control. (B)  
74 Confocal imaging of fluorescently tagged-acetylated  $\alpha$ -tubulin (red) was assessed in the A4832  
75 ascitic cells upon treatment with PFK158. DAPI was used to stain nucleus. Quantitation of percent  
76 ciliated cells was represented. (C) Percent cell viability as assessed by MTT assay in OVCAR8  
77 and (D) OVCAR5 cells with increasing concentration of cisplatin (0-40 $\mu$ M) alone and combined  
78 with 1/2 IC50 concentration of PFK158 in the mentioned cells and the shift in IC50 of cisplatin  
79 treatment was analyzed.

80

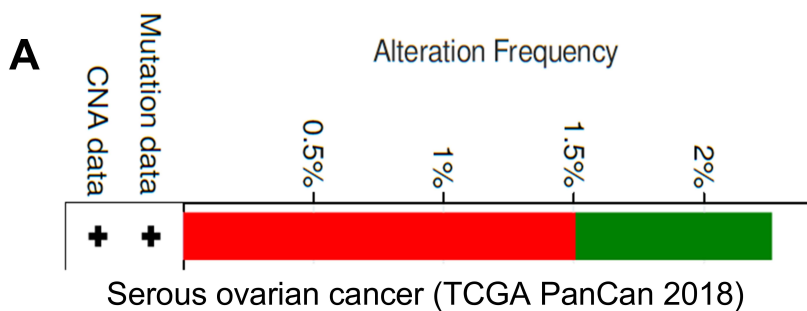

**Summary for Serous Ovarian Cancer**

Gene altered in 2.26% of 398 cases

| Alteration    | Frequency       |
|---------------|-----------------|
| Mutation      | 0.75% (3 cases) |
| Amplification | 1.51% (6 cases) |

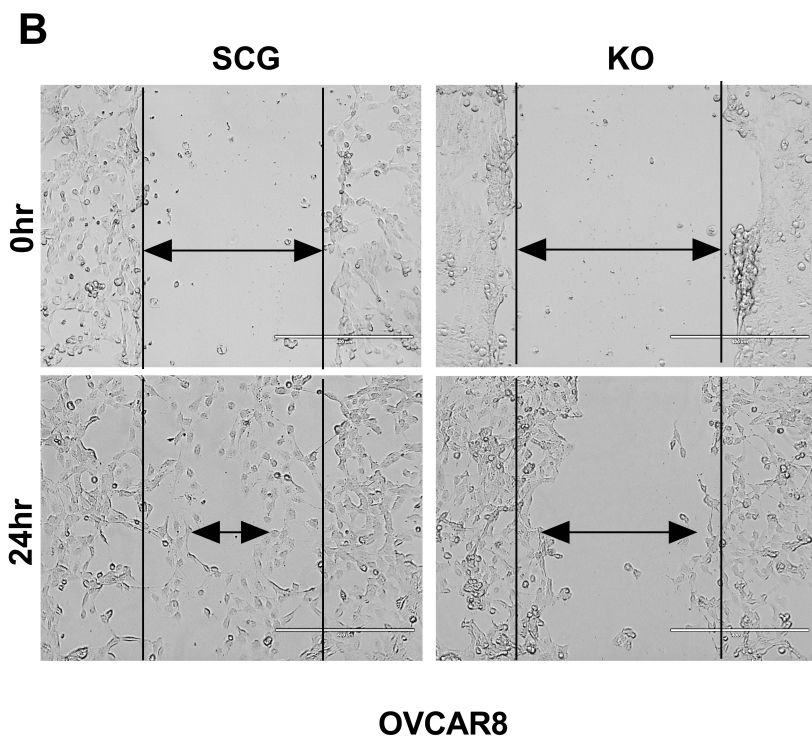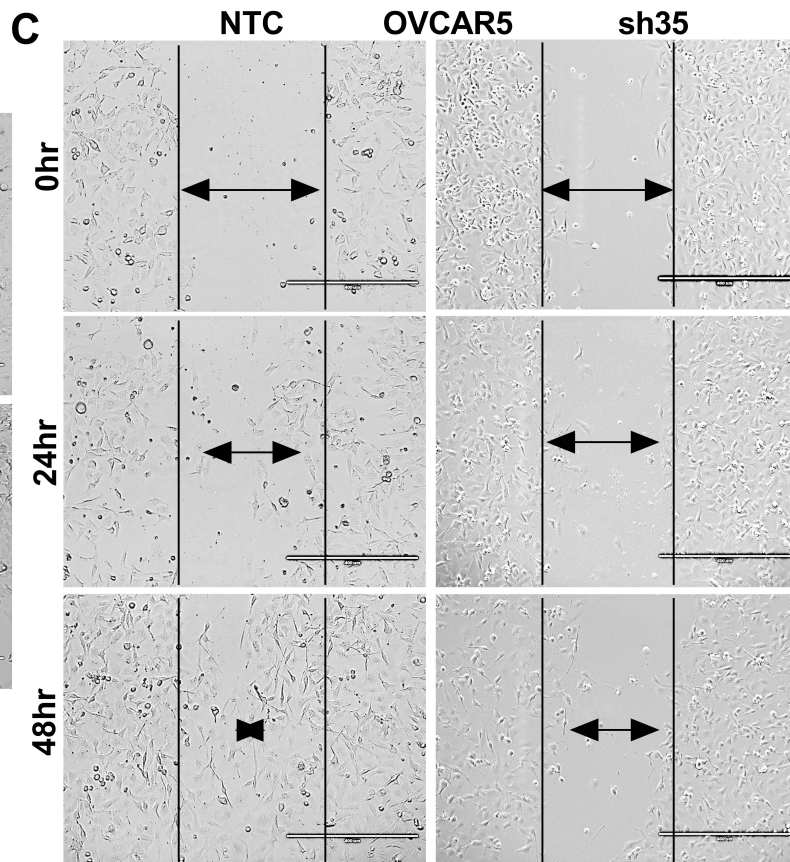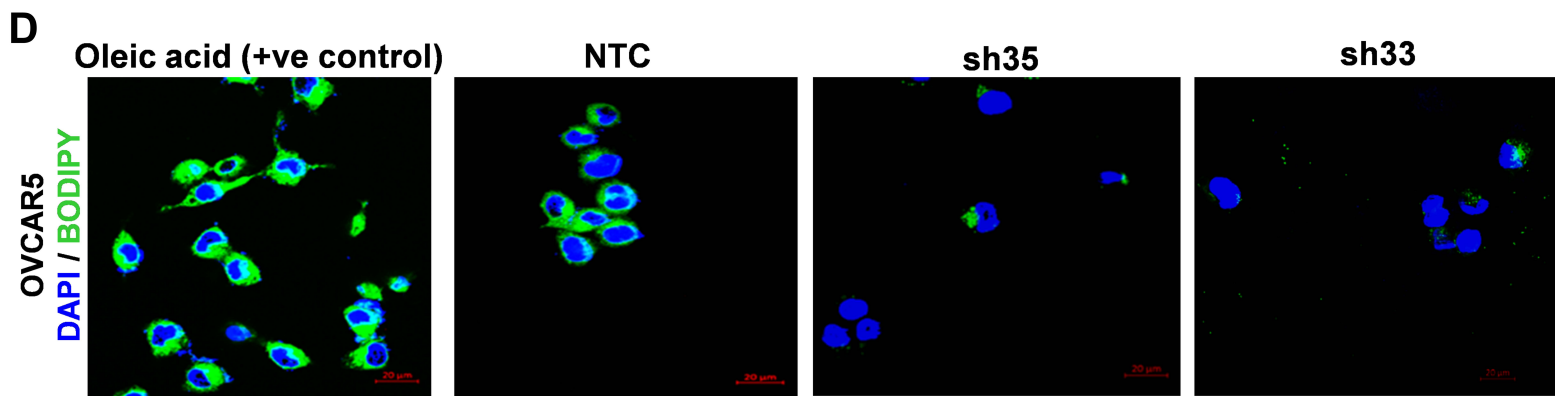

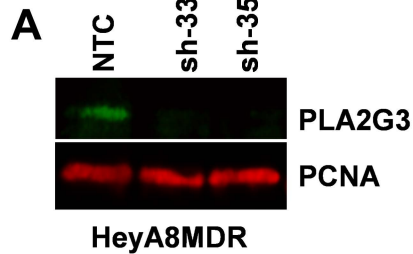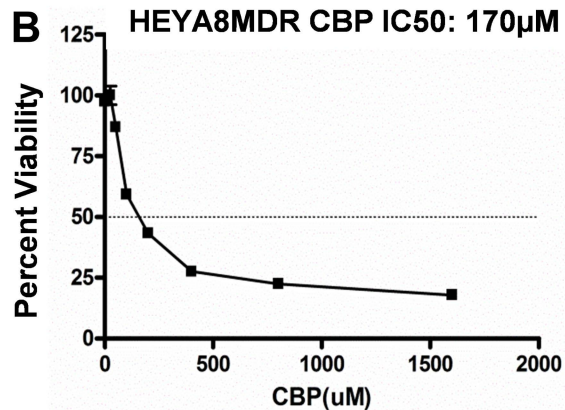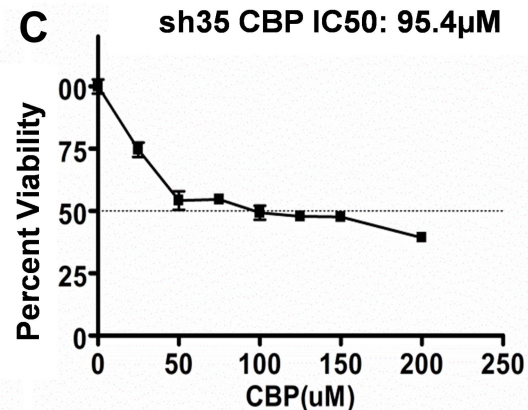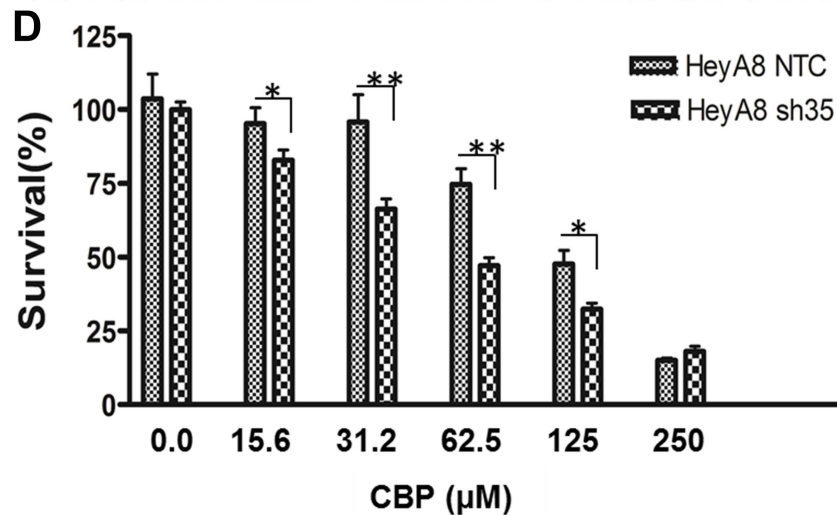

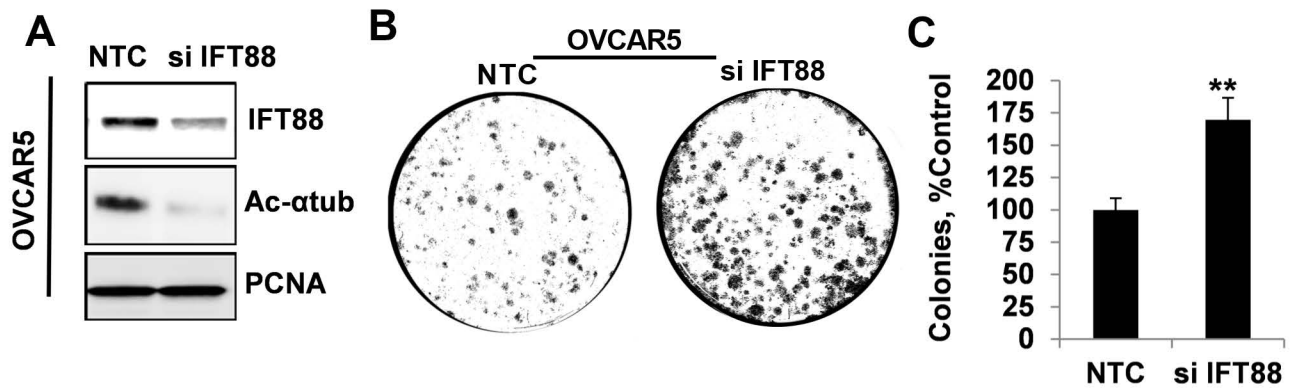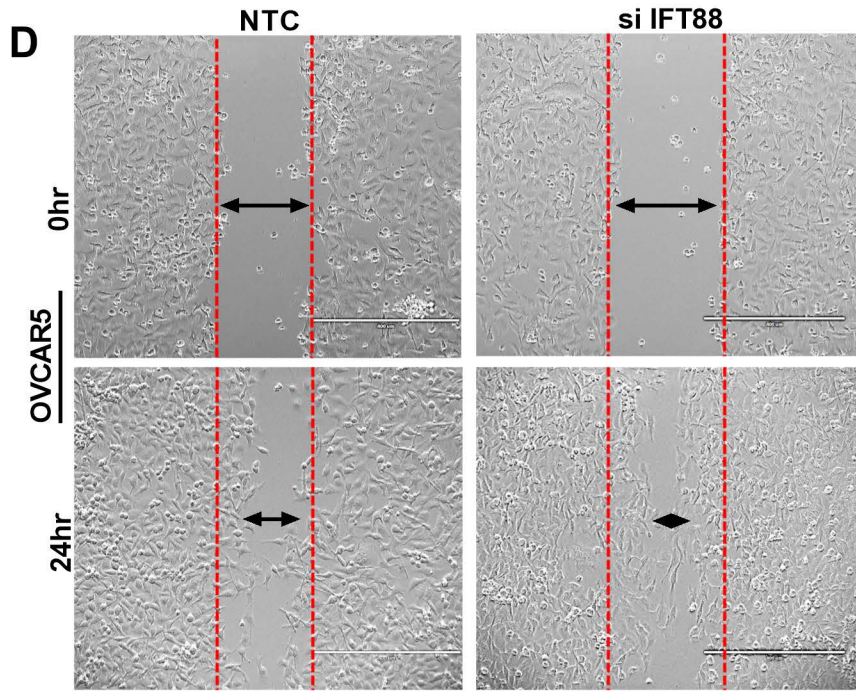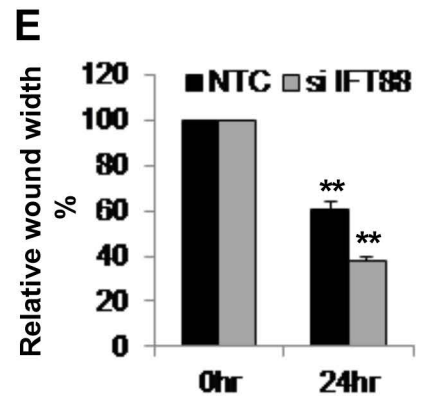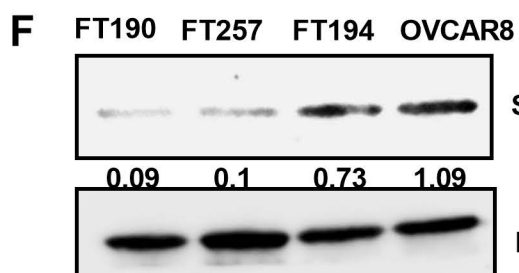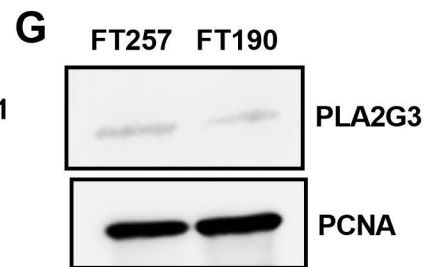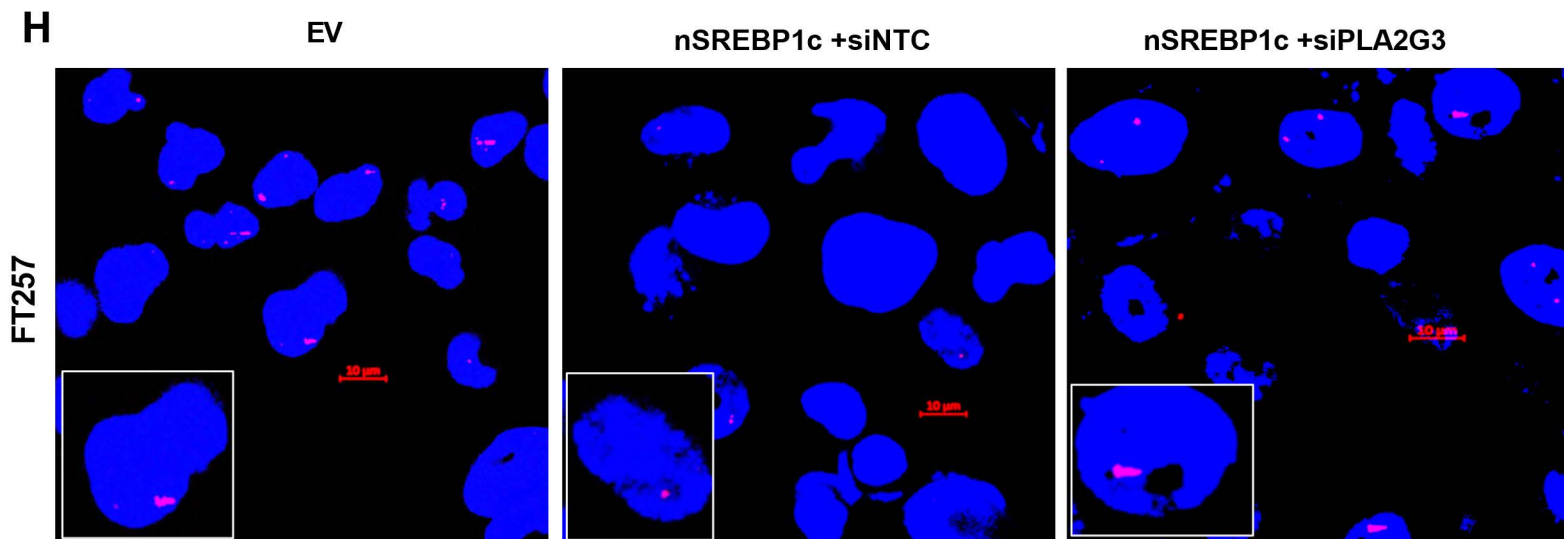



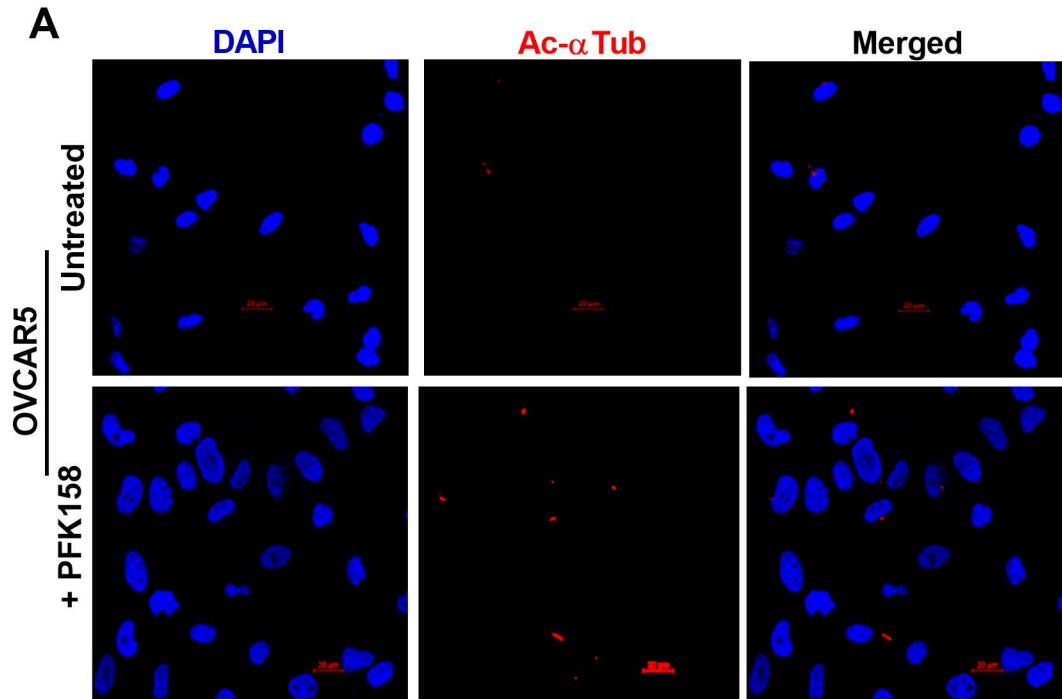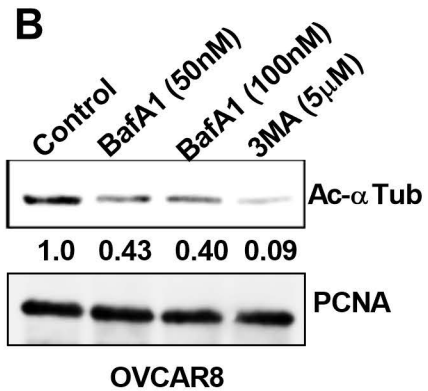

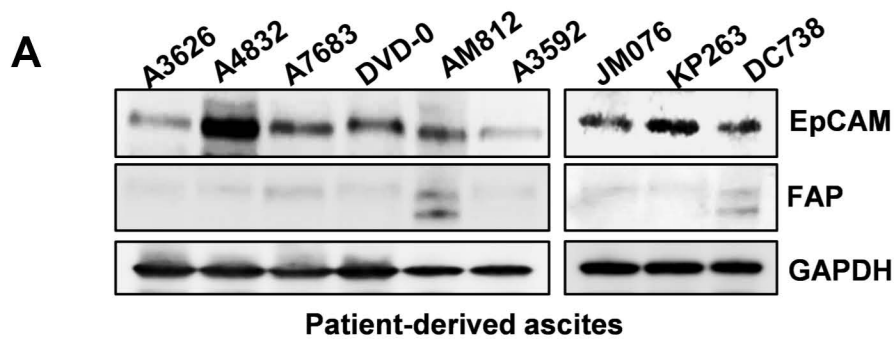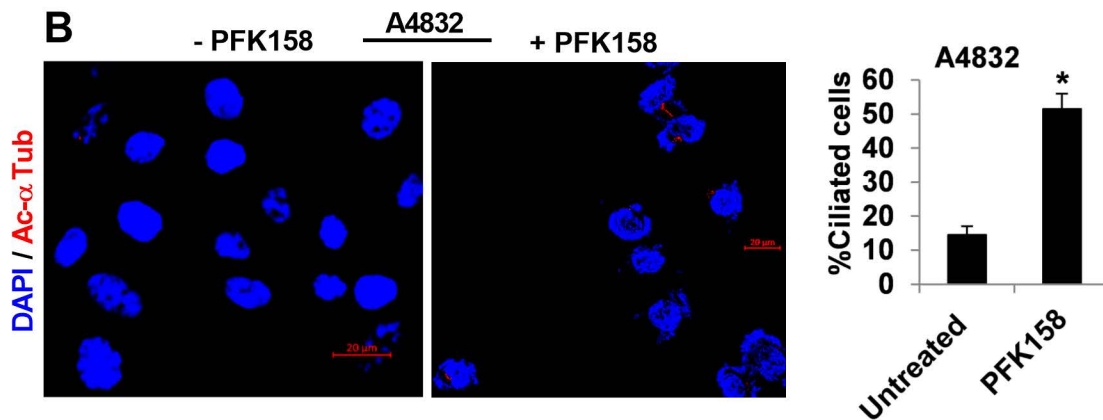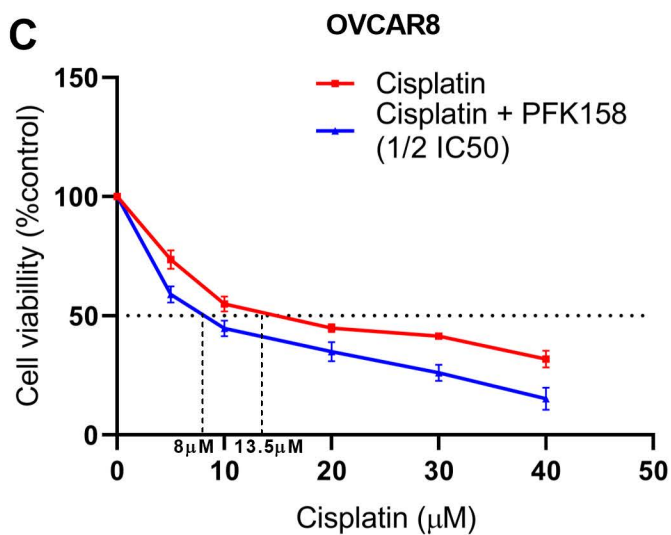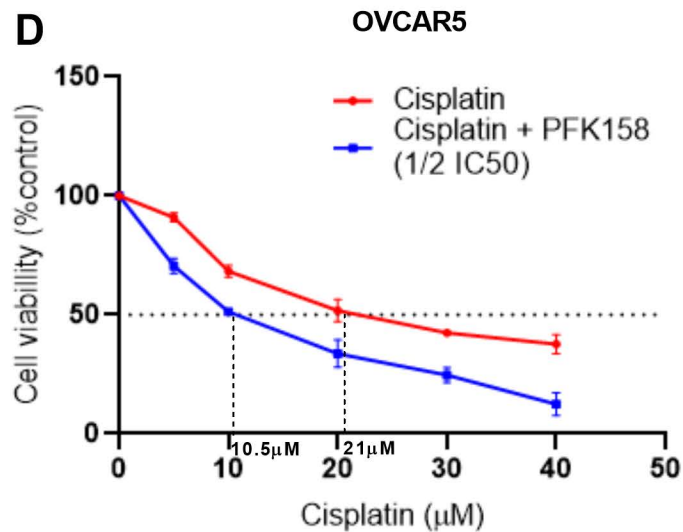

Supplement: 13046_2021_1985_MOESM1_ESM.pdf [file 13046_2021_1985_MOESM1_ESM.pdf]
